# Supplementary material
Source: Springer Nature journal article supplement (https://www.springermedizin.de/resource/supplementary/12947_2012_435_MOESM3_ESM.pdf/9555742)

## Lipid pool

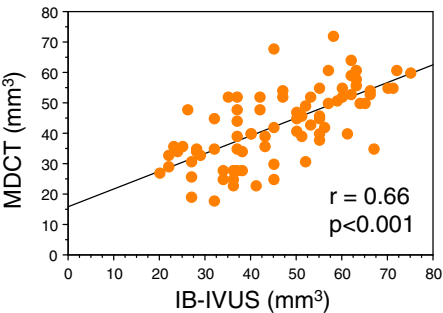

## Fibrosis

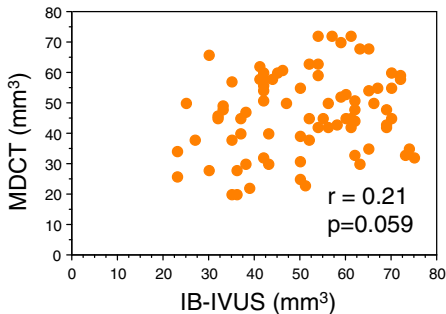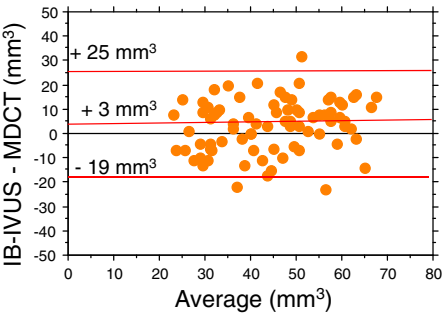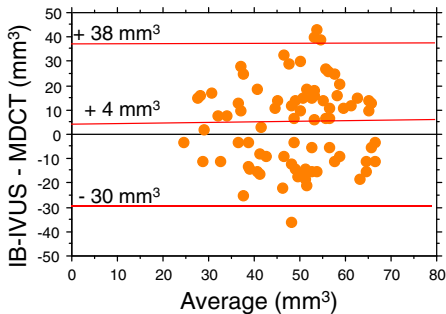

Supplement: MOESM3 [file 9555742]
